# Supplementary material for: Adaptive multi-interventional trial platform to improve patient care for fibrotic interstitial lung diseases
Source: PubMed Central journal article supplement — Thorax. 2024 Mar 6;79(8):788–95. doi: 10.1136/thorax-2023-221148 (PMC11287572; doi:10.1136/thorax-2023-221148), 2024-03-06
Supplement: thorax-2023-221148supp003.pdf [file thorax-2023-221148supp003.pdf]

**INTRODUCTION :** Les pneumopathies interstitielles diffuse fibrosantes (PIDf) sont un groupe hétérogène de maladies pulmonaires associées à une morbidité et une mortalité significative. Malgré une forte augmentation du nombre d'essais cliniques au cours des 10 dernières années, les traitements actuellement approuvés par les régulateurs se limitent à deux thérapies antifibrotique. Le « pipeline » de développement de médicaments est long et il est urgent d'accélérer ce processus. Ce manuscrit présente le concept et la conception d'une approche de recherche innovante pour le développement de médicaments dans les PIDf : une Plateforme Adaptative Multifactorielle Intégrée Randomisé Mondiale dans les PIDf (REMAP-ILD).

**MÉTHODES :** Description du concept et de la conception du REMAP-ILD : la terminologie spécifique, les caractéristiques de conception (multifactorielle, fonctionnalités adaptatives, approche statistique), la population cible, les interventions, les résultats, la mission et les valeurs, ainsi que la structure organisationnelle.

**RÉSULTATS :** La population cible sera constituée de patients adultes atteints de PIDf, et le critère principal sera un modèle de progression de la maladie intégrant la CVF (capacité vitale forcée) et la mortalité sur 12 mois. Une randomisation adaptative réactive, des seuils prédéfinis pour le succès et la futilité seront utilisés pour évaluer l'efficacité et la sécurité des interventions. REMAP-ILD embrasse les valeurs fondamentales de la diversité, de l'équité et de l'inclusion pour les patients et les chercheurs, et privilégie une approche de science ouverte pour le partage des données et la diffusion des résultats.

**CONCLUSION :** En utilisant un design innovant et efficace de plateforme d'essai multi-intervention adaptative, nous visons à accélérer et à améliorer les soins aux patients atteints de PIDf. Grâce à une collaboration mondiale, une méthodologie analytique novatrice et une livraison pragmatique d'essais, REMAP-ILD vise à surmonter les principales limitations associées aux approches classiques d'essais randomisé pour améliorer rapidement les soins des personnes vivant avec PIDf.
