# Supplementary material for: Adaptive multi-interventional trial platform to improve patient care for fibrotic interstitial lung diseases
Source: PubMed Central journal article supplement — Thorax. 2024 Mar 6;79(8):788–95. doi: 10.1136/thorax-2023-221148 (PMC11287572; doi:10.1136/thorax-2023-221148), 2024-03-06
Supplement: thorax-2023-221148supp004.pdf [file thorax-2023-221148supp004.pdf]

**INTRODUÇÃO:** As doenças pulmonares intersticiais fibrosantes (DPIf) constituem um grupo heterogêneo de doenças pulmonares associadas a significativa morbidade e mortalidade. Apesar do grande aumento no número de ensaios clínicos nos últimos 10 anos, os tratamentos farmacológicos atualmente aprovados por órgãos reguladores são limitadas a dois antifibróticos. O “pipeline” de desenvolvimento de medicamentos é longo e há uma necessidade urgente de acelerar esse processo. Este manuscrito introduz o conceito e o design de uma abordagem inovadora para acelerar o desenvolvimento de tratamentos em DPIf: uma Plataforma Adaptativa Multifatorial Inserida (na prática clínica) Randomizada Global em DPIf (REMAP-ILD).

**MÉTODOS:** Descrição do conceito e design do REMAP-ILD: terminologia específica, características do design (multifatorial, recursos adaptativos, abordagem estatística), população-alvo, intervenções, resultados, missão e valores, e estrutura organizacional.

**RESULTADOS:** A população-alvo serão pacientes adultos com DPIf, e o desfecho primário será um modelo de progressão da doença que incorpora a CVF (capacidade vital forçada) e mortalidade ao longo de 12 meses. A randomização adaptativa responsiva, limiares pré-especificados para sucesso e futilidade serão utilizados para avaliar a eficácia e segurança das intervenções. O REMAP-ILD abraça os valores fundamentais da diversidade, equidade e inclusão para pacientes e pesquisadores, e prioriza uma abordagem de ciência aberta para compartilhamento de dados e divulgação de resultados.

**CONCLUSÃO:** Ao utilizar um design de plataforma de ensaio inovador e eficiente, com múltiplas intervenções adaptativas, buscamos acelerar e melhorar o cuidado com pacientes com DPIf. Através da colaboração global, metodologia analítica inovadora e pragmatismo em pesquisa, o REMAP-ILD visa superar as principais limitações associadas às abordagens convencionais dos ensaios clínicos randomizados (ECR) com vistas a melhorar a assistência em saúde das pessoas que vivem com DPIf.
