# Supplementary material for: Adaptive multi-interventional trial platform to improve patient care for fibrotic interstitial lung diseases
Source: PubMed Central journal article supplement — Thorax. 2024 Mar 6;79(8):788–95. doi: 10.1136/thorax-2023-221148 (PMC11287572; doi:10.1136/thorax-2023-221148), 2024-03-06
Supplement: thorax-2023-221148supp005.pdf [file thorax-2023-221148supp005.pdf]

**INTRODUCCIÓN:** Las enfermedades pulmonares intersticiales difusas fibrosantes (EPIDf) son un grupo heterogéneo de enfermedades pulmonares asociadas con una morbilidad y mortalidad significativas. A pesar del incremento en el número de ensayos clínicos en los últimos 10 años, los tratamientos actualmente aprobados por las autoridades reguladoras se limitan a dos fármacos anti-fibróticos. El desarrollo de medicamentos es largo y existe una necesidad urgente de acelerar este proceso. Este manuscrito presenta un método de investigación farmacológica con concepto y diseño innovador en EPIDf: una Plataforma Adaptativa Multifactorial Randomizada Integradora y Global en EPIDf (REMAP-ILD).

**MÉTODOS:** Descripción del concepto y diseño de REMAP-ILD: terminología específica, características del diseño (multifactorial, características adaptativas, enfoque estadístico), población objetivo, intervenciones, resultados, misión y valores, y estructura organizativa.

**RESULTADOS:** La población objetivo serán pacientes adultos con EPIDf, y el objetivo principal a evaluar es la progresión de la enfermedad (reducción de la capacidad vital forzada (CVF), combinando un modelo bayesiano control) y la mortalidad a los 12 meses. Se utilizará una randomización adaptativa, límites preestablecidos para el éxito y la futilidad para evaluar la eficacia y seguridad de las intervenciones. REMAP-ILD abraza los valores fundamentales de diversidad, equidad e inclusión para pacientes e investigadores, y prioriza un enfoque de ciencia abierta para el intercambio de datos y la difusión de resultados.

**CONCLUSIÓN:** Al utilizar un diseño de plataforma de ensayos multi-intervencionales adaptativos e innovadores, buscamos acelerar y mejorar la atención a los pacientes con EPIDf. A través de la colaboración mundial, metodología analítica novedosa y entrega pragmática, REMAP-ILD tiene como objetivo superar las principales limitaciones asociadas con los ensayos clínicos randomizados para mejorar rápidamente la atención de las personas que viven con EPIDf.
